# Supplementary material
Source: Research Square preprint supplement (doi:10.21203/rs.3.rs-9794649/v1)
Supplement: Supplementary file 1 [file 5f942f8a75997f6cebb0a879.docx]

**Antileishmanial activity of gold(I) compounds containing triphenylphosphine ligands against *Leishmania amazonensis*: impacts on mitochondrial bioenergetics and trypanothione reductase activity**

Marcus Sávio Araujo Garcia1; [garciamarcus28@gmail.com](mailto:garciamarcus28@gmail.com); [orcid.org/0000-0001-6338-1929](http://orcid.org/0000-0001-6338-1929)

Vitor Klipel da Silva Bertolini1; [v289610@dac.unicamp.br](mailto:v289610@dac.unicamp.br); [orcid.org/0009-0001-0562-5080](http://orcid.org/0009-0001-0562-5080)

Cécile Exertier2; [cecile.exertier@cnr.it](mailto:cecile.exertier@cnr.it); [orcid.org/0000-0001-7457-6895](http://orcid.org/0000-0001-7457-6895)

Fernanda Ramos Gadelha1; [frgad@unicamp.br](mailto:frgad@unicamp.br); [orcid.org/0000-0002-1075-8830](http://orcid.org/0000-0002-1075-8830)

Andrea Ilari2; [andrea.ilari@cnr.it](mailto:andrea.ilari@cnr.it); [orcid.org/0000-0002-7754-399X](http://orcid.org/0000-0002-7754-399X)

Annarita Fiorillo3 [annarita.fiorillo@uniroma1.it](mailto:annarita.fiorillo@uniroma1.it); [orcid.org/0000-0002-8966-8554](http://orcid.org/0000-0002-8966-8554)

Jennyfer Castro4; [jcastro.quimica@outlook.com](mailto:jcastro.quimica@outlook.com); <https://orcid.org/0009-0001-5045-8947>

Camilla Abbehausen4; [camilla@unicamp.br](mailto:camilla@unicamp.br); [orcid.org/0000-0002-8410-2252](http://orcid.org/0000-0002-8410-2252)

Danilo Ciccone Miguel1,# [dcmiguel@unicamp.br](mailto:dcmiguel@unicamp.br); [orcid.org/0000-0003-0522-6562](http://orcid.org/0000-0003-0522-6562)

1Institute of Biology, University of Campinas, São Paulo, Brazil.

2Institute of Molecular Biology and Pathology (IBPM) of the National Research Council of Italy (CNR), c/o Department of Biochemical Sciences, Sapienza University of Rome, Roma 00185, Italy.

3Department of Biochemical Sciences, Sapienza University of Rome, Roma 00185, Italy.

4Institute of Chemistry, University of Campinas, Campinas, São Paulo, Brazil.

#Corresponding author


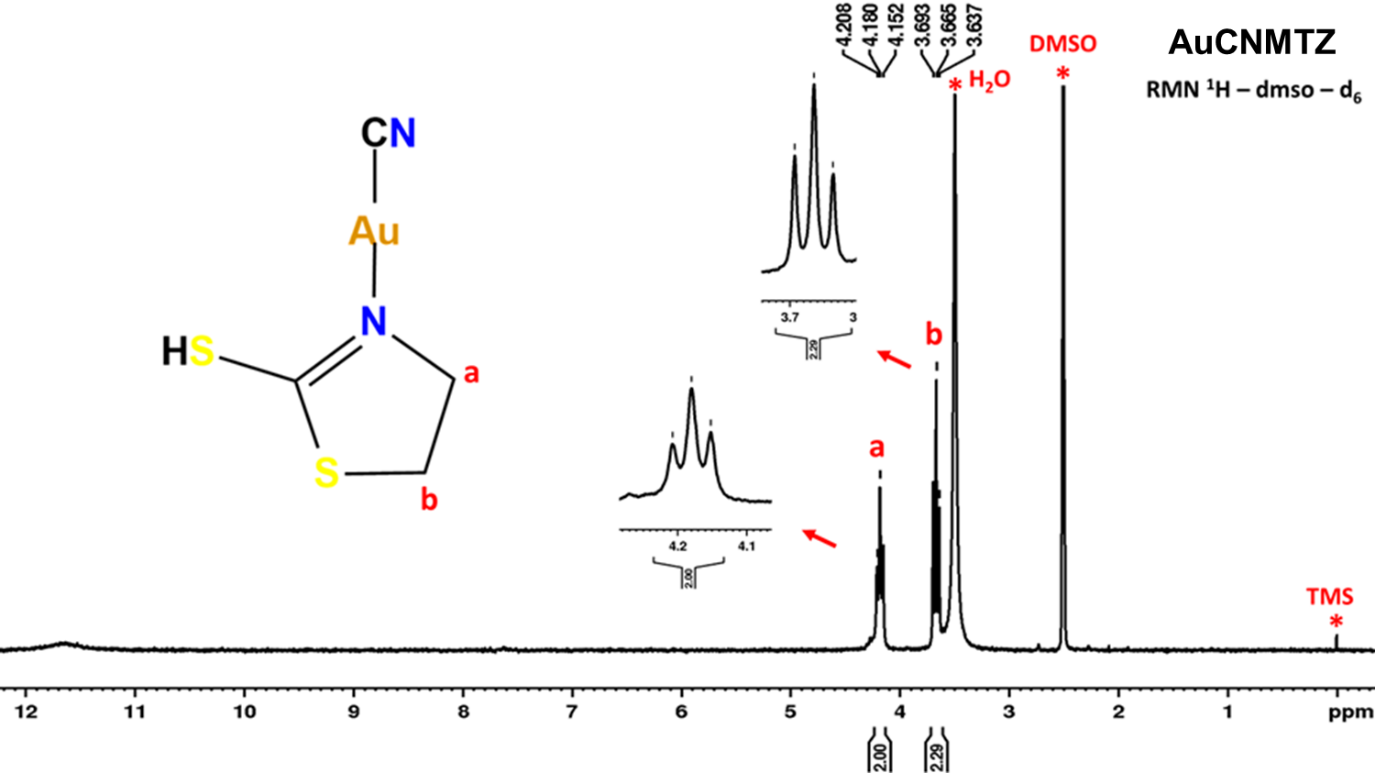


**Fig. S1** 1H NMR spectrum of the AuCNMTZ complex in DMSO-d6. The chemical shifts (δ) expressed in ppm corresponding to the CH2 groups of the ligand are 4.20–4.15 (t, 2H) and 3.69–3.63 (t, 2H).


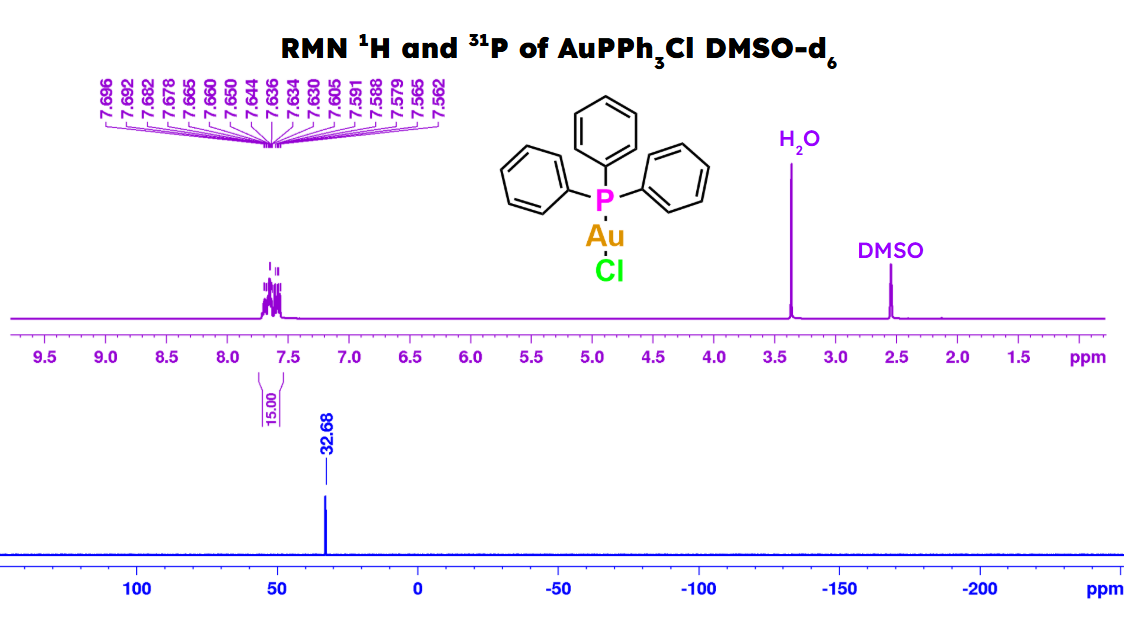


**Fig. S2** 1H and 31P NMR spectra of the AuPPh3Cl complex in DMSO-d6. The observed chemical shifts (δ) in ppm are 7.61–7.50 (m, 15H, Ar–H) in the 1H spectrum and 32.68 in the 31P spectrum.


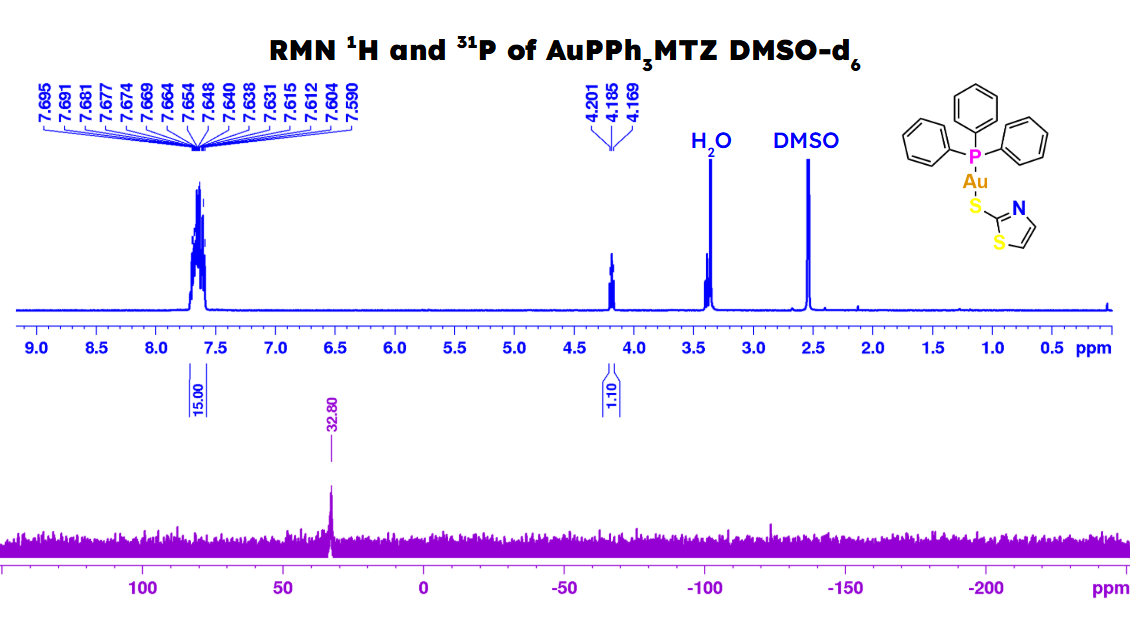


**Fig. S3** 1H and 31P NMR spectra of the AuPPh3MTZ complex in DMSO-d6. The observed chemical shifts (δ) in ppm are 7.61–7.50 (m, 15H, Ar–H) in the 1H spectrum and 36.05 in the 31P spectrum.
